# Supplementary material
Source: PubMed Central journal article supplement (PMC3585058)
Supplement: supp_M112.431239_jbc.M112.431239-1.pdf [file supp_M112.431239_jbc.M112.431239-1.pdf]

FIGURE S1

A

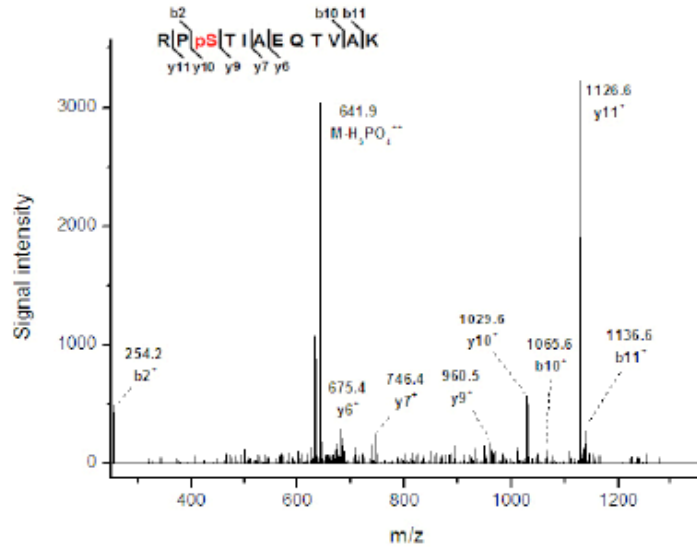

B

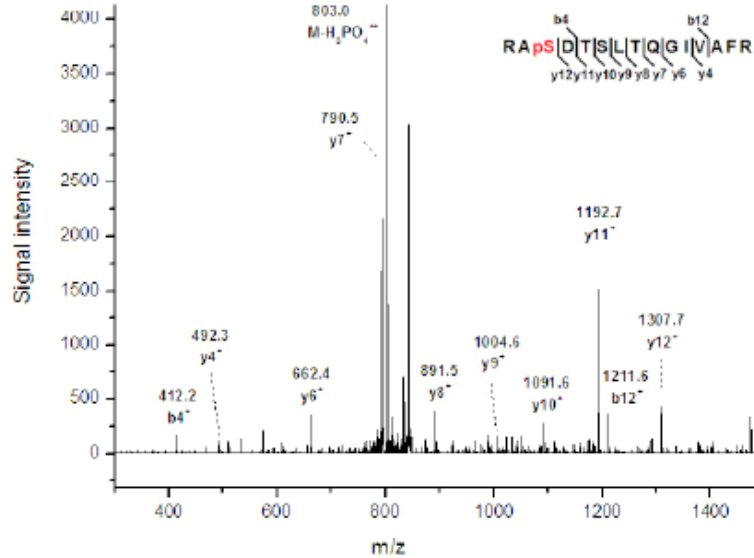

**SUPPLEMENTAL FIGURE S1.** Identification of SIK2 post-translational modifications. FLAG-tagged SIK2 was purified from HEK293T cells and in-gel digested by trypsin. The peptides were then analyzed using LC-MS (see EXPERIMENTAL PROCEDURES). MS/MS spectra of tryptic SIK2 fragments containing Ser358 phosphorylation (A) and Ser587 phosphorylation (B) are shown.
